# Supplementary material for: Fimasartan, an angiotensin II receptor antagonist, ameliorates an in vivo zebrafish model of heart failure
Source: PubMed Central journal article supplement — Korean J Intern Med. 2020 Mar 13;35(6):1400–10. doi: 10.3904/kjim.2019.038 (PMC7652659; doi:10.3904/kjim.2019.038), 2020-03-13
Supplement: kjim-2019-038-suppl.pdf [file kjim-2019-038-suppl.pdf]

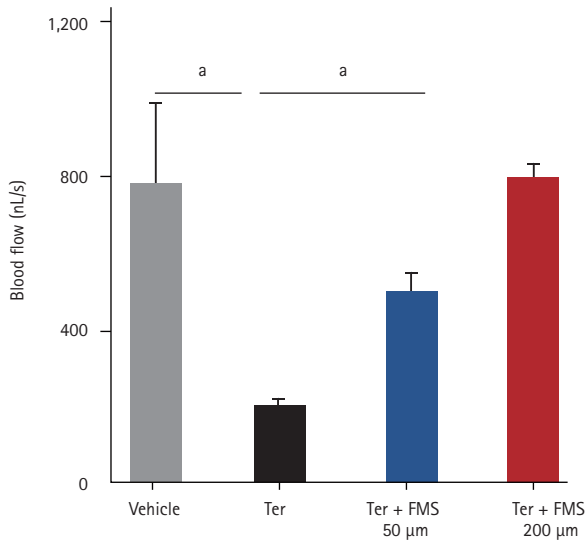

**Supplementary Figure 1.** Blood flow velocity according to fimasartan dose. Ter, terfenadine; FMS, fimasartan. <sup>a</sup> $p < 0.05$ .
